# Supplementary material
Source: publisher figshare collection journal article supplement (https://tandf.figshare.com/articles/dataset/_/14678247)
Supplement: Supplementary file 1 [file 1]

## **SUPPLEMENTARY APPENDIX 1: Search and screening details**

### **INCLUSION/EXCLUSION CRITERIA**

#### **Eligibility criteria – dementia apps were designed:**

1. With a primary focus of increasing awareness and understanding of dementia
2. With the aim of helping to address the care needs and considerations for persons living with dementia
3. With content regarding management or prevention of dementia, where at least two dimensions of health are addressed (e.g. physical, mental, spiritual, social).
4. For target populations including persons living with dementia, their caregivers, community members, medical staff and health workers.
5. For use with smartphones and/or tablet computers

#### **Exclusions**

Due to the scope of this study, apps with a specific focus on one aspect or a standalone practical 'activity, tip or modification' for persons living with dementia were excluded. Examples of such apps included:

- Narrow preventative focus – e.g. brain training game apps are solely designed for building mental/cognitive function (including those designed for persons living with dementia); prevention diets; or exercise program to avoid dementia
- Narrow diagnostic dementia focus - e.g. cognitive testing, screening
- Use of intelligent assistive technology or monitoring of dementia patients or others e.g. home sensors, GPS tracking
- Standalone practical apps –simplified day/night clocks, memory aids or meal reminders, relaxation apps (e.g. sound therapy)
- Other standalone apps – e.g. Fundraising apps or apps for specific events or locations

#### **Specific exclusion criteria**

1. App was not readily available for Australian consumers or health professionals to download onto a smartphone or tablet computer
2. The app did not state it was available in English (Multi-linguistic apps had to include English option)
3. The app did not significantly or primarily relate to dementia or Alzheimer's – it did not focus on dementia information, care needs and considerations for persons living with dementia. Neither did it have a focus on information and promotion of holistic prevention of dementia
4. The app had a narrow preventative focus via a single health domain - mental/cognitive, physical, social, spiritual e.g. brain training game apps for building mental/cognitive function (including those designed for persons living with dementia); prevention diets OR exercise programs to avoid dementia

5. The app was focused on intelligent assistive technology or monitoring of dementia patients or others e.g. home sensors, GPS tracking
6. The app had a narrow diagnostic dementia focus (e.g. cognitive testing, screening)
7. Standalone practical apps –simplified day/night clocks, memory aids or meal reminders, relaxation apps (e.g. sound therapy)
8. The app was a standalone resource for an event, specific purpose e.g. fundraising, or location e.g. international residential aged care venue
9. The app had technical issues that prevented it from being started or used to any meaningful extent
10. Duplicate of other app in the final list

**Additional comments:**

- International apps were checked for English version
- Caregiver apps had to be multi-dimensional not simply a calendar/appointment/logistic/co-ordination

## APP SEARCH TERMS AND WEBSITES

### *Website searches*

| Website Name                        | Website address                                                                                             | Sub pages                                                                                   | Key words                                    |
|-------------------------------------|-------------------------------------------------------------------------------------------------------------|---------------------------------------------------------------------------------------------|----------------------------------------------|
| Alzheimer's Disease International   | <a href="https://www.alz.co.uk">https://www.alz.co.uk</a>                                                   | Search tab                                                                                  | App; mobile app                              |
| Dementia Alliance International     | <a href="https://www.dementiaallianceinternational.org/">https://www.dementiaallianceinternational.org/</a> | Search tab                                                                                  | App; mobile app                              |
| Alzheimer's Association             | <a href="https://www.alz.org">https://www.alz.org</a>                                                       | Search tab; Help and Support/Resources                                                      | Mobile app                                   |
| Dementia Australia                  | <a href="https://www.dementia.org.au">https://www.dementia.org.au</a>                                       | Search tab; Resources tab                                                                   | App; Mobile app                              |
| Alzheimer's Queensland              | <a href="https://www.alzheimersonline.org">https://www.alzheimersonline.org</a>                             | Search tab; Our services                                                                    | Mobile app                                   |
| Beyond Blue                         | <a href="https://www.beyondblue.org.au">https://www.beyondblue.org.au</a>                                   | Search tab; Get support tab                                                                 | Dementia app                                 |
| VicHealth                           | <a href="https://www.vichealth.vic.gov.au">https://www.vichealth.vic.gov.au</a>                             | Search tab; Media and resources                                                             | Dementia app; dementia                       |
| Black Dog Institute                 | <a href="https://www.blackdoginstitute.org.au">https://www.blackdoginstitute.org.au</a>                     | Search tab; Getting help/Self-help tools and apps                                           | Dementia                                     |
| Lowitja Institute                   | <a href="https://www.lowitja.org.au">https://www.lowitja.org.au</a>                                         | Search tab; Resources/Elders; Resources/Health conditions; Google search "Lowitja dementia" | Dementia; Alzheimer's; Cognitive impairment; |
| Australian Indigenous HealthInfoNet | <a href="https://healthinonet.ecu.edu.au">https://healthinonet.ecu.edu.au</a>                               | Search tab; Publications; Resources; Policies; Programs/Current research; Organisations     | Dementia                                     |

The keywords used for these searches were used where appropriate depending on the nature of the website and organisation.

## ONLINE STORE SEARCHES

| App Store             | Website address                                                   | Keywords                                              | Device/s                                                                               |
|-----------------------|-------------------------------------------------------------------|-------------------------------------------------------|----------------------------------------------------------------------------------------|
| Google Play App Store | <a href="https://play.google.com/">https://play.google.com/</a>   | Dementia;<br>Alzheimer's;<br>Alzheimers;<br>Alzheimer | Samsung Galaxy Tab A (SM-T290);<br>Samsung S10+;<br>Microsoft Surface Pro 6 (1796)     |
| Apple App Store       | <a href="https://apps.apple.com/au">https://apps.apple.com/au</a> | Dementia;<br>Alzheimer's;<br>Alzheimers;<br>Alzheimer | Apple iPad mini 2 (FE277X/A);<br>iPhone 7 (MN502X/A);<br>Apple MacBook Pro (MR942LL/A) |
