# Supplementary material
Source: publisher figshare collection journal article supplement (https://tandf.figshare.com/articles/dataset/_/14678247)
Supplement: Supplementary file 2 [file 1]

Supplementary Appendix 2: Table 1 Characteristics, availability and MARS scores of dementia apps (N=75)

Data correct as at 30 July 2020

N.B. Data refers to the information from the platform the app was reviewed on (e.g. version);  
NER: Not enough reviews; \$AU: Australian dollars; N/A: Not available; MARS: Mobile Application Review System; -: available; #: DevaWorld App no longer available direct to consumer

|                                                                    | 1                            | 2                       | 3                                       | 4                                                                                | 5                                              | 6             | 7                              | 8                                            | 9           | 10                                                   | 11                            | 12                          | 13                     | 14                  | 15                  |
|--------------------------------------------------------------------|------------------------------|-------------------------|-----------------------------------------|----------------------------------------------------------------------------------|------------------------------------------------|---------------|--------------------------------|----------------------------------------------|-------------|------------------------------------------------------|-------------------------------|-----------------------------|------------------------|---------------------|---------------------|
| APP DETAILS                                                        |                              |                         |                                         |                                                                                  |                                                |               |                                |                                              |             |                                                      |                               |                             |                        |                     |                     |
| App Name                                                           | A Simple Day                 | A Walk Through Dementia | Accessible Alzheimers And Dementia Care | Activities for care: elderly dementia LD seniors (Android), RemindMEcare (Apple) | Alternative Treatments for Alzheimer's Disease | Alzheimer     | Alzheimer Exam Review App 2020 | Alzheimer: Causes, Diagnosis, and Management | Alzheimer's | Alzheimer's and Parkinson's Disease by GoLearningBus | Alzheimer's Assoc Science Hub | Alzheimer's Daily Companion | Alzheimer's Disease    | Alzheimer's disease | Alzheimer's Disease |
| Platform available on                                              | iPhone                       | •                       | •                                       | •                                                                                | •                                              | •             | •                              | •                                            | •           | •                                                    | •                             | •                           | •                      | •                   | •                   |
|                                                                    | iPad                         | •                       | •                                       | •                                                                                | •                                              | •             | •                              | •                                            | •           | •                                                    | •                             | •                           | •                      | •                   | •                   |
|                                                                    | Android                      | •                       | •                                       | •                                                                                | •                                              | •             | •                              | •                                            | •           | •                                                    | •                             | •                           | •                      | •                   | •                   |
| Platform tested on                                                 | iPad                         | iPad                    | iPad                                    | Android                                                                          | Android                                        | Android       | iPhone                         | Android                                      | Android     | iPad                                                 | iPad                          | iPad                        | Android                | Android             | Android             |
| Developer                                                          | Heather Ryan                 | Alzheimer's Research UK | AHC GLOBAL, INC.                        | Health-Connected.co m Ltd.                                                       | Developer: AdSense Gorilla, Creator: Lee Elson | FabGiver Apps | Tourkia CHIHI                  | Health Info                                  | EI Makaoui  | Quizmine.Com                                         | Alzheimer's Association       | Home Instead Senior Care    | Pineapple Root Studios | Anass apps          | Koodalappz          |
| Rating (out of 5)                                                  | 5                            | 4.5                     | NER                                     | 4.1                                                                              | NER                                            | NER           | NER                            | NER                                          | NER         | NER                                                  | 5.0                           | NER                         | NER                    | 3.2                 | NER                 |
| Number of ratings                                                  | 2                            | 5                       | 0                                       | 14                                                                               | 0                                              | 0             | 0                              | 0                                            | 0           | 0                                                    | 43                            | 0                           | 0                      | 5                   | 0                   |
| Version                                                            | 1.2                          | Unknown                 | 1.0                                     | 1.2                                                                              | 1.0                                            | 1.0           | 3                              | 3.0.0                                        | 1.0         | 2.5                                                  | 1.2.7                         | 2.0.4                       | 1.0                    | 1.0                 | 2.4                 |
| Last update                                                        | 16-Aug-2018                  | Unknown                 | Unknown                                 | 18-Mar-20                                                                        | 10-Nov-19                                      | 13-Oct-2018   | 04-Mar-2020                    | 11-Jan-2020                                  | 22-Oct-19   | 12-May-16                                            | 4-May-2020                    | 21-Apr-18                   | 10-Jan-2019            | 20-Feb-2017         | 10-Aug-2019         |
| Cost (\$AU)                                                        | 0                            | 0                       | 0                                       | 0                                                                                | 0                                              | 0             | 4.49                           | 0                                            | 0           | 0                                                    | 0                             | 0                           | 0                      | 0                   | 0                   |
| Upgrade (\$AU)                                                     | \$14.99/month (30 days free) | N/A                     | N/A                                     | 0 (free during COVID-19)                                                         | N/A                                            | N/A           | N/A                            | N/A                                          | N/A         | 14.99                                                | N/A                           | N/A                         | N/A                    | N/A                 | N/A                 |
| Content of apps - focus areas                                      |                              |                         |                                         |                                                                                  |                                                |               |                                |                                              |             |                                                      |                               |                             |                        |                     |                     |
| (i) Information & Resources                                        |                              | •                       | •                                       |                                                                                  | •                                              | •             | •                              | •                                            | •           | •                                                    | •                             | •                           | •                      | •                   | •                   |
| (ii) Practical Caregiving & Communication                          | •                            |                         |                                         | •                                                                                |                                                |               |                                | •                                            |             |                                                      |                               | •                           |                        |                     |                     |
| (iii) Caregiver Support & Resources                                |                              |                         | •                                       |                                                                                  |                                                |               |                                |                                              |             |                                                      |                               | •                           |                        |                     |                     |
| (iv) Prevention (Multidimensional)                                 |                              |                         |                                         |                                                                                  | •                                              | •             |                                | •                                            |             |                                                      |                               |                             |                        |                     |                     |
| Age group/s                                                        | Adults, General              | General                 | Adults                                  | Young Adults, Adults                                                             | Adults                                         | Adults        | Young Adults, Adults           | Young Adults, Adults                         | Adults      | Adults                                               | Adults                        | Adults                      | Adults                 | Adults              | Adults              |
| Target user group/s                                                |                              |                         |                                         |                                                                                  |                                                |               |                                |                                              |             |                                                      |                               |                             |                        |                     |                     |
| (i) Person living with dementia                                    | •                            |                         |                                         | •                                                                                | •                                              | •             |                                |                                              | •           |                                                      |                               |                             | •                      | •                   | •                   |
| (ii) Primary caregiver (informal) or partner/spouse                | •                            |                         | •                                       | •                                                                                | •                                              | •             |                                | •                                            | •           |                                                      |                               | •                           | •                      | •                   | •                   |
| (iii) Family or close friends                                      | •                            | •                       | •                                       | •                                                                                |                                                | •             |                                |                                              | •           |                                                      |                               | •                           | •                      | •                   | •                   |
| (iv) Health and medical professionals, students, formal caregivers |                              |                         |                                         |                                                                                  |                                                | •             | •                              | •                                            | •           | •                                                    | •                             | •                           | •                      | •                   | •                   |
| (v) General public                                                 |                              | •                       |                                         |                                                                                  |                                                | •             |                                |                                              |             |                                                      | •                             |                             |                        |                     |                     |
| Affiliation                                                        | Unknown                      | NGO                     | Commercial                              | Commercial                                                                       | Unknown                                        | Unknown       | Commercial                     | Unknown                                      | Unknown     | Commercial                                           | NGO                           | Commercial                  | Unknown                | Unknown             | Unknown             |
| Language/s                                                         | English                      | English                 | English                                 | English                                                                          | English                                        | English       | English                        | English                                      | English     | English                                              | English                       | English                     | English                | English             | English             |
| MARS "Overall Quality" (mean)                                      | 3.05                         | 3.83                    | 2.15                                    | 2.93                                                                             | 2.65                                           | 2.42          | 3.02                           | 2.53                                         | 2.3         | 1.94                                                 | 3.08                          | 3.51                        | 2.29                   | 2.48                | 2.14                |
| Engagement (mean)                                                  | 2.8                          | 3.8                     | 1.2                                     | 3.4                                                                              | 2                                              | 2.2           | 3.6                            | 1.8                                          | 2.2         | 1.6                                                  | 2.8                           | 3.2                         | 1.4                    | 2.4                 | 2.2                 |
| Functionality (mean)                                               | 3.75                         | 4                       | 3.25                                    | 2.5                                                                              | 3.75                                           | 3             | 3.25                           | 3.5                                          | 3           | 2.5                                                  | 2.5                           | 4                           | 3.25                   | 3                   | 2.75                |
| Aesthetics (mean)                                                  | 2.67                         | 3.33                    | 2.33                                    | 3.33                                                                             | 2.33                                           | 2.5           | 2                              | 2.33                                         | 2           | 2.67                                                 | 3                             | 3                           | 2.5                    | 2                   | 2                   |
| Information (mean)                                                 | 3                            | 4.2                     | 1.8                                     | 2.5                                                                              | 2.5                                            | 2             | 3.25                           | 2.5                                          | 2           | 1                                                    | 4                             | 3.83                        | 2                      | 2.5                 | 1.6                 |
| MARS "Subjective Quality" (mean)                                   | 2                            | 2.5                     | 1.25                                    | 1.75                                                                             | 1.25                                           | 1.75          | 3.25                           | 1.75                                         | 1           | 1                                                    | 2                             | 2.75                        | 1                      | 1.75                | 1                   |
| Recommend app                                                      | 2                            | 3                       | 1                                       | 2                                                                                | 1                                              | 2             | 3                              | 2                                            | 1           | 1                                                    | 2                             | 3                           | 1                      | 2                   | 1                   |
| Potential app use                                                  | 3                            | 2                       | 1                                       | 2                                                                                | 2                                              | 2             | 4                              | 2                                            | 1           | 1                                                    | 2                             | 4                           | 1                      | 2                   | 1                   |
| Pay for app                                                        | 1                            | 1                       | 1                                       | 1                                                                                | 1                                              | 1             | 3                              | 1                                            | 1           | 1                                                    | 1                             | 1                           | 1                      | 1                   | 1                   |
| Overall star rating (out of 5)                                     | 2                            | 4                       | 2                                       | 2                                                                                | 1                                              | 2             | 3                              | 2                                            | 1           | 1                                                    | 3                             | 3                           | 1                      | 2                   | 1                   |

**Supplementary Appendix 2: Table 1 Characteristics, availability and MARS scores of dementia apps (N=75)**

Data correct as at 30 July 2020

|                                                                    | 16                                       | 17                        | 18                              | 19                    | 20                            | 21                     | 22                                      | 23                                               | 24                          | 25                   | 26                          | 27                                                                           | 28                                                 | 29                           | 30                                             |
|--------------------------------------------------------------------|------------------------------------------|---------------------------|---------------------------------|-----------------------|-------------------------------|------------------------|-----------------------------------------|--------------------------------------------------|-----------------------------|----------------------|-----------------------------|------------------------------------------------------------------------------|----------------------------------------------------|------------------------------|------------------------------------------------|
| APP DETAILS                                                        |                                          |                           |                                 |                       |                               |                        |                                         |                                                  |                             |                      |                             |                                                                              |                                                    |                              |                                                |
| App Name                                                           | Alzheimer's Disease @PoC (Provider side) | Alzheimer's Disease App 1 | Alzheimer's Disease Pocketcard  | Alzheimer's Disease.. | Alzheimer's Disease/ Dementia | Alzheimer's guide      | Alzheimer's Manager (@PoC Patient side) | Alzheimers News and Chat                         | Alzheimer's Risk Calculator | Alzheimer's Support  | Alzheimer's Treatment - FAQ | ALZHEIMER'S UNIVERSE (ALZU)                                                  | ALZHWELL: An app for Pre/Post Alzheimer's Patients | Anton - The Licorice Mystery | Balance: Alzheimers Caregiving                 |
| Platform available on                                              | iPhone                                   | •                         | •                               | •                     | •                             | •                      | •                                       | •                                                | •                           | •                    | •                           | •                                                                            | •                                                  | •                            | •                                              |
|                                                                    | iPad                                     | •                         | •                               | •                     | •                             | •                      | •                                       | •                                                | •                           | •                    | •                           | •                                                                            | •                                                  | •                            | •                                              |
|                                                                    | Android                                  | •                         | •                               | •                     | •                             | •                      | •                                       | •                                                | •                           | •                    | •                           | •                                                                            | •                                                  | •                            | •                                              |
| Platform tested on                                                 | iPad                                     | Android                   | iPad                            | iPhone                | Android                       | Android                | iPad                                    | Android                                          | Android                     | iPad                 | Android                     | iPad                                                                         | Android                                            | Android                      | iPad                                           |
| Developer                                                          | @Point of Care                           | Cool App Developer        | Börm Bruckmeier Publishing LLC. | mmotio                | SolutionSappS 7               | Free Apps For Everyone | @Point of Care                          | Developer: Gore Health Apps, Creator: Alz Angels | MoodNote LLC.               | MyHealth Teams, Inc. | Things To Do                | Developer: AtPlayMusicLLC, Creator: Weill Cornell Medicine & NY Presbyterian | ALZHWELL                                           | Huusmann Media               | National Alzheimer Center, River Spring Health |
| Rating (out of 5)                                                  | NER                                      | NER                       | 5                               | NER                   | NER                           | NER                    | NER                                     | NER                                              | 2.5                         | 5                    | NER                         | 5                                                                            | 4.7                                                | NER                          | NER                                            |
| Number of ratings                                                  | 0                                        | 0                         | 3                               | 0                     | 0                             | 0                      | 0                                       | 0                                                | 6                           | 3                    | 0                           | 1                                                                            | 95                                                 | 0                            | 0                                              |
| Version                                                            | 10.6.2                                   | 1.0                       | 3.1                             | 1.1                   | 2.0                           | 1.1                    | 10.4.1                                  | 1                                                | 4.0.0                       | 12.0.4               | 5                           | 1.6.0                                                                        | 1.0                                                | 1.0                          | 1.2                                            |
| Last update                                                        | 07-Jan-2019                              | 03-Jan-2020               | 19-Dec-2019                     | 12-Jan-2019           | 16-Jun-2018                   | 31-May-2018            | 19-Nov-2019                             | 22-Aug-2018                                      | 09-Apr-2019                 | 06-Nov-19            | 19-May-2018                 | 31-May-17                                                                    | 22-Mar-2019                                        | 03-Nov-2015                  | 16-Oct-17                                      |
| Cost (\$AU)                                                        | 0                                        | 0                         | 0                               | 10.99                 | 0                             | 0                      | 0                                       | 0                                                | 0                           | 0                    | 0                           | 0                                                                            | 0                                                  | 0                            | 1.49                                           |
| Upgrade (\$AU)                                                     | N/A                                      | N/A                       | N/A                             | N/A                   | N/A                           | N/A                    | N/A                                     | N/A                                              | N/A                         | N/A                  | N/A                         | N/A                                                                          | N/A                                                | N/A                          | N/A                                            |
| Content of apps - focus areas                                      |                                          |                           |                                 |                       |                               |                        |                                         |                                                  |                             |                      |                             |                                                                              |                                                    |                              |                                                |
| (i) Information & Resources                                        | •                                        | •                         | •                               | •                     | •                             | •                      | •                                       | •                                                | •                           | •                    | •                           | •                                                                            | •                                                  | •                            | •                                              |
| (ii) Practical Caregiving & Communication                          |                                          | •                         |                                 | •                     |                               |                        | •                                       |                                                  |                             | •                    |                             |                                                                              | •                                                  | •                            | •                                              |
| (iii) Caregiver Support & Resources                                |                                          |                           |                                 |                       |                               |                        |                                         | •                                                |                             | •                    |                             | •                                                                            |                                                    |                              | •                                              |
| (iv) Prevention (Multidimensional)                                 |                                          |                           |                                 |                       |                               |                        | •                                       |                                                  | •                           |                      |                             |                                                                              |                                                    |                              |                                                |
| Age group/s                                                        | Adults                                   | Young Adults, Adults      | Adults                          | Adults                | Adults                        | Young Adults, Adults   | General                                 | Adults                                           | Young Adults, Adults        | Young Adults, Adults | Adults                      | Young Adults, Adults                                                         | Adults                                             | Children, Adults             | Adults                                         |
| Target user group/s                                                |                                          |                           |                                 |                       |                               |                        |                                         |                                                  |                             |                      |                             |                                                                              |                                                    |                              |                                                |
| (i) Person living with dementia                                    |                                          | •                         |                                 | •                     | •                             | •                      | •                                       | •                                                |                             |                      |                             |                                                                              | •                                                  |                              |                                                |
| (ii) Primary caregiver (informal) or partner/spouse                |                                          | •                         |                                 | •                     | •                             | •                      | •                                       | •                                                |                             | •                    | •                           | •                                                                            | •                                                  |                              | •                                              |
| (iii) Family or close friends                                      |                                          |                           |                                 | •                     |                               |                        |                                         | •                                                |                             | •                    |                             |                                                                              | •                                                  | •                            | •                                              |
| (iv) Health and medical professionals, students, formal caregivers | •                                        |                           | •                               |                       |                               |                        |                                         | •                                                |                             |                      | •                           | •                                                                            |                                                    |                              | •                                              |
| (v) General public                                                 |                                          |                           |                                 |                       |                               |                        |                                         |                                                  | •                           |                      |                             |                                                                              |                                                    | •                            |                                                |
| Affiliation                                                        | Commercial                               | Unknown                   | Commercial, NGO                 | Unknown               | Unknown                       | Unknown                | Commercial                              | Unknown                                          | Unknown                     | Commercial           | Unknown                     | Commercial, University                                                       | University                                         | Unknown                      | Commercial                                     |
| Language/s                                                         | English                                  | English                   | English                         | English               | English                       | English                | English                                 | English                                          | English                     | English              | English, Spanish            | English                                                                      | English                                            | English                      | English                                        |
| MARS "Overall Quality" (mean)                                      | 3.04                                     | 1.68                      | 3.77                            | 2.97                  | 1.89                          | 2.48                   | 3.44                                    | 2.21                                             | 2.19                        | 3.8                  | 2.71                        | 3.27                                                                         | 2.5                                                | 3.36                         | 4.26                                           |
| Engagement (mean)                                                  | 3                                        | 1.8                       | 3.4                             | 2.2                   | 1.8                           | 2.2                    | 3                                       | 2.4                                              | 2.6                         | 4.6                  | 2.6                         | 2.8                                                                          | 2.4                                                | 3.2                          | 4.2                                            |
| Functionality (mean)                                               | 2.75                                     | 2.25                      | 4                               | 4                     | 2.75                          | 3.25                   | 3.75                                    | 2.75                                             | 2.25                        | 4                    | 3.25                        | 3                                                                            | 3.25                                               | 4                            | 4.25                                           |
| Aesthetics (mean)                                                  | 3                                        | 1.67                      | 3.67                            | 4                     | 2                             | 2.67                   | 4                                       | 1.67                                             | 1.67                        | 3                    | 3                           | 3.67                                                                         | 2.33                                               | 3                            | 4.33                                           |
| Information (mean)                                                 | 3.4                                      | 1                         | 4                               | 1.67                  | 1                             | 1.8                    | 3                                       | 2                                                | 2.25                        | 3.6                  | 2                           | 3.6                                                                          | 2                                                  | 3.25                         | 4.25                                           |
| MARS "Subjective Quality" (mean)                                   | 2                                        | 1                         | 3.75                            | 1.5                   | 1                             | 1.25                   | 2                                       | 1                                                | 1.75                        | 3.25                 | 1.75                        | 2.25                                                                         | 1                                                  | 3                            | 4.25                                           |
| Recommend app                                                      | 2                                        | 1                         | 3                               | 2                     | 1                             | 1                      | 2                                       | 1                                                | 2                           | 4                    | 2                           | 3                                                                            | 1                                                  | 3                            | 4                                              |
| Potential app use                                                  | 2                                        | 1                         | 4                               | 2                     | 1                             | 1                      | 2                                       | 1                                                | 2                           | 4                    | 2                           | 2                                                                            | 1                                                  | 3                            | 4                                              |
| Pay for app                                                        | 1                                        | 1                         | 3                               | 1                     | 1                             | 1                      | 1                                       | 1                                                | 1                           | 1                    | 1                           | 1                                                                            | 1                                                  | 3                            | 5                                              |
| Overall star rating (out of 5)                                     | 3                                        | 1                         | 5                               | 1                     | 1                             | 2                      | 3                                       | 1                                                | 2                           | 4                    | 2                           | 3                                                                            | 1                                                  | 3                            | 4                                              |

Supplementary Appendix 2: Table 1 Characteristics, availability and MARS scores of dementia apps (N=75)  
Data correct as at 30 July 2020

|                                                                    | 31                       | 32                                                                  | 33               | 34                                                                              | 35                                | 36                                 | 37                     | 38                   | 39                   | 40                          | 41                                                                 | 42                                                         | 43                                   | 44                     | 45                     |
|--------------------------------------------------------------------|--------------------------|---------------------------------------------------------------------|------------------|---------------------------------------------------------------------------------|-----------------------------------|------------------------------------|------------------------|----------------------|----------------------|-----------------------------|--------------------------------------------------------------------|------------------------------------------------------------|--------------------------------------|------------------------|------------------------|
| APP DETAILS                                                        |                          |                                                                     |                  |                                                                                 |                                   |                                    |                        |                      |                      |                             |                                                                    |                                                            |                                      |                        |                        |
| App Name                                                           | BEAT-D                   | Best Alzheimers Products                                            | BrainSHIELD      | Care and Connect : Dementia Friendly Places (Apple), Care and Connect (Android) | Care4Dementia                     | Caregivers Matter by GLSS          | CogniCare              | ConsultGer: Dementia | dementia             | Dementia (via Indextra App) | Dementia Caregiver Solutions                                       | Dementia Emergency                                         | Dementia Environment Assessment Tool | Dementia Guide Expert  | Dementia Overview      |
| Platform available on                                              | iPhone                   |                                                                     |                  |                                                                                 |                                   |                                    |                        |                      |                      |                             |                                                                    |                                                            |                                      |                        |                        |
|                                                                    | iPad                     |                                                                     |                  |                                                                                 |                                   |                                    |                        |                      |                      |                             |                                                                    |                                                            |                                      |                        |                        |
|                                                                    | Android                  |                                                                     |                  |                                                                                 |                                   |                                    |                        |                      |                      |                             |                                                                    |                                                            |                                      |                        |                        |
| Platform tested on                                                 | iPad                     | Android                                                             | iPad             | iPad                                                                            | iPad                              | iPad                               | iPad                   | iPad                 | Android              | Android                     | iPhone                                                             | iPad                                                       | Android                              | iPad                   | iPad                   |
| Developer                                                          | University of Wollongong | Developer: Leverage Mobile 360, Creator: BestAlzheimersProducts.com | Annielyticx Inc. | University of Newcastle Upon Tyne                                               | The University of New South Wales | Greater Lynn Senior Services, Inc. | CogniHealth Ltd.       | New York University  | El Makaoui           | Indextra AB                 | Developer: Lorenzo Gentile, Creator: Angela Gentile & Karen Tyrell | Developer: Applnstitute.co.uk Creator: Dignity in Dementia | University of Worcester Media Lab    | University of Illinois | Healthcentric Advisors |
| Rating (out of 5)                                                  | 5                        | NER                                                                 | NER              | NER                                                                             | NER                               | 5                                  | NER                    | 5                    | NER                  | NER                         | 1.0                                                                | NER                                                        | NER                                  | NER                    | NER                    |
| Number of ratings                                                  | 1                        | 0                                                                   | 0                | 0                                                                               | 0                                 | 1                                  | 0                      | 2                    | 0                    | 0                           | 1                                                                  | 0                                                          | 0                                    | 0                      | 0                      |
| Version                                                            | 3.1.4                    | 1.0                                                                 | 1.0.2            | 1.2                                                                             | 1.0                               | 1.1                                | 1.4.2                  | 1.0                  | 2.0                  | 2.3.1                       | 1.1                                                                | 1.2                                                        | 0.0.1                                | 1.1.3                  | 1.23                   |
| Last update                                                        | 17-Mar-2017              | 02-Aug-2019                                                         | 26-Oct-2019      | 13-Jun-2015                                                                     | 13-Sep-2015                       | 07-Nov-2017                        | 02-Apr-2020            | 02-Mar-2015          | 07-Dec-2019          | 28-Jul-2017                 | 03-Feb-16                                                          | 26-Feb-2016                                                | 03-Mar-2018                          | 1-Apr-2020             | 16-Nov-2018            |
| Cost (\$AU)                                                        | 0                        | 0                                                                   | 0                | 0                                                                               | 0                                 | 0                                  | 0                      | 0                    | 0                    | 65.99                       | 4.49                                                               | 0                                                          | 0                                    | 0                      | 0                      |
| Upgrade (\$AU)                                                     | N/A                      | In-app purchases                                                    | N/A              | N/A                                                                             | 0                                 | N/A                                | N/A                    | N/A                  | N/A                  | N/A                         | N/A                                                                | N/A                                                        | N/A                                  | N/A                    | N/A                    |
| Content of apps - focus areas                                      |                          |                                                                     |                  |                                                                                 |                                   |                                    |                        |                      |                      |                             |                                                                    |                                                            |                                      |                        |                        |
| (i) Information & Resources                                        |                          |                                                                     |                  |                                                                                 |                                   |                                    |                        |                      |                      |                             |                                                                    |                                                            |                                      |                        |                        |
| (ii) Practical Caregiving & Communication                          |                          |                                                                     |                  |                                                                                 |                                   |                                    |                        |                      |                      |                             |                                                                    |                                                            |                                      |                        |                        |
| (iii) Caregiver Support & Resources                                |                          |                                                                     |                  |                                                                                 |                                   |                                    |                        |                      |                      |                             |                                                                    |                                                            |                                      |                        |                        |
| (iv) Prevention (Multidimensional)                                 |                          |                                                                     |                  |                                                                                 |                                   |                                    |                        |                      |                      |                             |                                                                    |                                                            |                                      |                        |                        |
| Age group/s                                                        | Adults                   | Adults                                                              | Adults           | General                                                                         | Adults                            | Adults                             | Adults                 | Adults               | Young Adults, Adults | Adults                      | Adults                                                             | Adults                                                     | Young Adults, Adults                 | Adults                 | Adults                 |
| Target user group/s                                                |                          |                                                                     |                  |                                                                                 |                                   |                                    |                        |                      |                      |                             |                                                                    |                                                            |                                      |                        |                        |
| (i) Person living with dementia                                    |                          |                                                                     |                  |                                                                                 |                                   |                                    |                        |                      |                      |                             |                                                                    |                                                            |                                      |                        |                        |
| (ii) Primary caregiver (informal) or partner/spouse                |                          |                                                                     |                  |                                                                                 |                                   |                                    |                        |                      |                      |                             |                                                                    |                                                            |                                      |                        |                        |
| (iii) Family or close friends                                      |                          |                                                                     |                  |                                                                                 |                                   |                                    |                        |                      |                      |                             |                                                                    |                                                            |                                      |                        |                        |
| (iv) Health and medical professionals, students, formal caregivers |                          |                                                                     |                  |                                                                                 |                                   |                                    |                        |                      |                      |                             |                                                                    |                                                            |                                      |                        |                        |
| (v) General public                                                 |                          |                                                                     |                  |                                                                                 |                                   |                                    |                        |                      |                      |                             |                                                                    |                                                            |                                      |                        |                        |
| Affiliation                                                        | Government, University   | Commercial                                                          | Unknown          | University                                                                      | University                        | NGO                                | Commercial, University | University           | Unknown              | University                  | Commercial                                                         | NGO                                                        | University                           | University             | NGO                    |
| Language/s                                                         | English                  | English                                                             | English          | English                                                                         | English                           | English                            | English                | English              | English              | English                     | English                                                            | English                                                    | English                              | English                | English                |
| MARS "Overall Quality" (mean)                                      | 3.68                     | 2.36                                                                | 3.62             | 3.62                                                                            | 3.73                              | 3.53                               | 3.6                    | 3.58                 | 1.86                 | 2.99                        | 3.31                                                               | 3.45                                                       | 3.5                                  | 3.34                   | 3.4                    |
| Engagement (mean)                                                  | 3.2                      | 2.6                                                                 | 3.6              | 3.4                                                                             | 3.4                               | 3.2                                | 3.4                    | 3                    | 1.6                  | 2.2                         | 3                                                                  | 2.8                                                        | 3.6                                  | 2.6                    | 2.6                    |
| Functionality (mean)                                               | 4.5                      | 2.25                                                                | 3.75             | 4.25                                                                            | 4                                 | 4                                  | 3.67                   | 4                    | 2.75                 | 2.75                        | 3.75                                                               | 3.75                                                       | 4                                    | 3.25                   | 3.5                    |
| Aesthetics (mean)                                                  | 3.67                     | 2                                                                   | 4                | 3.67                                                                            | 3.67                              | 3.33                               | 3.67                   | 3.33                 | 1.33                 | 2.5                         | 3                                                                  | 3.67                                                       | 3                                    | 3.33                   | 3.5                    |
| Information (mean)                                                 | 3.33                     | 2.6                                                                 | 3.14             | 3.17                                                                            | 3.83                              | 3.6                                | 3.67                   | 4                    | 1.75                 | 4.5                         | 3.5                                                                | 3.6                                                        | 3.4                                  | 4.2                    | 4                      |
| MARS "Subjective Quality" (mean)                                   | 2.75                     | 2                                                                   | 2.25             | 2.25                                                                            | 3.75                              | 2                                  | 2.75                   | 2.25                 | 1                    | 2.75                        | 3.25                                                               | 2                                                          | 3.25                                 | 2.5                    | 2.75                   |
| Recommend app                                                      | 3                        | 3                                                                   | 3                | 2                                                                               | 4                                 | 2                                  | 3                      | 2                    | 1                    | 2                           | 3                                                                  | 2                                                          | 4                                    | 3                      | 3                      |
| Potential app use                                                  | 2                        | 2                                                                   | 2                | 3                                                                               | 3                                 | 2                                  | 3                      | 3                    | 1                    | 3                           | 4                                                                  | 2                                                          | 3                                    | 2                      | 3                      |
| Pay for app                                                        | 3                        | 1                                                                   | 1                | 1                                                                               | 3                                 | 1                                  | 1                      | 1                    | 1                    | 3                           | 3                                                                  | 1                                                          | 3                                    | 1                      | 1                      |
| Overall star rating (out of 5)                                     | 3                        | 2                                                                   | 3                | 3                                                                               | 5                                 | 3                                  | 4                      | 3                    | 1                    | 3                           | 3                                                                  | 3                                                          | 3                                    | 4                      | 4                      |

Supplementary Appendix 2: Table 1 Characteristics, availability and MARS scores of dementia apps (N=75)  
Data correct as at 30 July 2020

|                                                                    | 46                               | 47                                         | 48                            | 49                              | 50              | 51                       | 52                       | 53                                                               | 54                                 | 55                                | 56                        | 57                                                                   | 58                                                               | 59                       | 60                               |
|--------------------------------------------------------------------|----------------------------------|--------------------------------------------|-------------------------------|---------------------------------|-----------------|--------------------------|--------------------------|------------------------------------------------------------------|------------------------------------|-----------------------------------|---------------------------|----------------------------------------------------------------------|------------------------------------------------------------------|--------------------------|----------------------------------|
| APP DETAILS                                                        |                                  |                                            |                               |                                 |                 |                          |                          |                                                                  |                                    |                                   |                           |                                                                      |                                                                  |                          |                                  |
| App Name                                                           | Dementia Personal Outcomes v.2   | Dementia Understanding Stress and Disgress | DementiAssist                 | DemKconnect - Dementia Care App | Deva World      | DTA Behaviours           | DTA Medications          | FAQs in Alzheimer disease (also released as 'Alzheimer Disease') | Free Alzheimer's and Dementia News | G30 - A Memory Maze               | Geras Solutions           | Healthy Brains (Apple), Healthy Brains by Cleveland Clinic (Android) | Hello Brain                                                      | How to Prevent Alzheimer | Iridis                           |
| Platform available on                                              | iPhone                           |                                            | •                             | •                               |                 | •                        | •                        |                                                                  |                                    | •                                 |                           | •                                                                    |                                                                  |                          | •                                |
|                                                                    | iPad                             | •                                          | •                             | •                               | •               | •                        | •                        |                                                                  |                                    | •                                 |                           | •                                                                    |                                                                  |                          | •                                |
|                                                                    | Android                          | •                                          | •                             | •                               | •               | •                        |                          | •                                                                | •                                  | •                                 | •                         | •                                                                    | •                                                                | •                        | •                                |
| Platform tested on                                                 | iPad                             | iPad                                       | iPad                          | iPad                            | iPad            | iPad                     | iPad                     | Android                                                          | Android                            | iPhone                            | Android                   | iPad                                                                 | Android                                                          | Android                  | iPad                             |
| Developer                                                          | Scottish Social Services Council | Scottish Social Services Council           | Baylor Scott and White Health | Nightingales Medical Trust      | Mentia, Inc.    | University of Wollongong | University of Wollongong | Focus Medica India Pvt. Ltd.                                     | Gore Health Apps                   | Kovalov Ivan                      | Geras Solutions AB        | Cleveland Clinic Innovations                                         | Developer: Trinity Brain Health, Creator: Trinity College Dublin | NonitaDev                | Space Architecture (Europe) Ltd. |
| Rating (out of 5)                                                  | NER                              | NER                                        | NER                           | NER                             | NER             | NER                      | 2.0                      | NER                                                              | NER                                | 4.7                               | NER                       | NER                                                                  | NER                                                              | NER                      | NER                              |
| Number of ratings                                                  | 0                                | 0                                          | 0                             | 0                               | 0               | 0                        | 1                        | 0                                                                | 0                                  | 25                                | 0                         | 0                                                                    | 0                                                                | 0                        | 0                                |
| Version                                                            | 2.0                              | 2.0                                        | 1.4                           | 1.0.24                          | 2.1.2           | 1.01                     | 1.11                     | 1.0                                                              | 1.0                                | 1.2.2                             | 1.5.0                     | 3.1                                                                  | 1.2                                                              | 1.0                      | 1.5                              |
| Last update                                                        | 10-Mar-2016                      | 10-Mar-2016                                | 30-Aug-2019                   | 9-May-2020                      | 17-Jul-2019     | 7-Sep-2017               | 9-Sep-2017               | 05-Jul-2016                                                      | 12-May-19                          | 1-Feb-2020                        | 19-Apr-2020               | 9-May-2019                                                           | 13-Aug-2018                                                      | 27-Jun-2018              | 20-Mar-2018                      |
| Cost (\$AU)                                                        | 0                                | 0                                          | 0                             | 0                               | 0 #             | 0                        | 0                        | 0                                                                | 0                                  | 5.99                              | 0                         | 0                                                                    | 0                                                                | 0                        | 0                                |
| Upgrade (\$AU)                                                     | N/A                              | N/A                                        | N/A                           | N/A                             | N/A             | N/A                      | N/A                      | \$3.29                                                           | N/A                                | N/A                               | N/A                       | N/A                                                                  | N/A                                                              | N/A                      | N/A                              |
| Content of apps - focus areas                                      |                                  |                                            |                               |                                 |                 |                          |                          |                                                                  |                                    |                                   |                           |                                                                      |                                                                  |                          |                                  |
| (i) Information & Resources                                        | •                                | •                                          | •                             | •                               |                 |                          |                          | •                                                                | •                                  | •                                 | •                         |                                                                      | •                                                                |                          |                                  |
| (ii) Practical Caregiving & Communication                          | •                                | •                                          | •                             | •                               | •               | •                        |                          |                                                                  |                                    |                                   | •                         |                                                                      |                                                                  |                          | •                                |
| (iii) Caregiver Support & Resources                                |                                  |                                            |                               |                                 |                 |                          | •                        |                                                                  |                                    |                                   |                           |                                                                      |                                                                  |                          |                                  |
| (iv) Prevention (Multidimensional)                                 |                                  |                                            |                               |                                 |                 |                          |                          |                                                                  |                                    |                                   |                           |                                                                      |                                                                  |                          |                                  |
| Age group/s                                                        | Adults                           | Adults                                     | Adults                        | Adults                          | Adults          | Adults                   | Adults                   | Young Adults, Adults                                             | Young Adults, Adults               | Adolescents, Young Adults, Adults | Adults                    | General                                                              | Young Adults, Adults                                             | Adults                   | Adults                           |
| Target user group/s                                                |                                  |                                            |                               |                                 |                 |                          |                          |                                                                  |                                    |                                   |                           |                                                                      |                                                                  |                          |                                  |
| (i) Person living with dementia                                    |                                  |                                            |                               | •                               | •               |                          |                          |                                                                  |                                    |                                   | •                         |                                                                      |                                                                  |                          |                                  |
| (ii) Primary caregiver (informal) or partner/spouse                | •                                | •                                          | •                             | •                               |                 | •                        |                          |                                                                  | •                                  |                                   | •                         |                                                                      |                                                                  |                          |                                  |
| (iii) Family or close friends                                      |                                  |                                            |                               |                                 |                 |                          |                          |                                                                  | •                                  |                                   | •                         |                                                                      |                                                                  |                          |                                  |
| (iv) Health and medical professionals, students, formal caregivers | •                                | •                                          | •                             |                                 |                 | •                        | •                        | •                                                                |                                    |                                   | •                         |                                                                      |                                                                  |                          | •                                |
| (v) General public                                                 |                                  |                                            |                               |                                 |                 |                          |                          |                                                                  |                                    | •                                 |                           | •                                                                    | •                                                                | •                        |                                  |
| Affiliation                                                        | Government                       | Government                                 | Commercial, University        | NGO                             | Commercial      | University               | University               | Commercial                                                       | Unknown                            | Unknown                           | University                | Commercial                                                           | University                                                       | Unknown                  | University                       |
| Language/s                                                         | English                          | English                                    | English                       | English                         | English, French | English                  | English                  | English                                                          | English                            | English                           | English, Swedish, Chinese | English                                                              | English, German, French                                          | English                  | English                          |
| MARS "Overall Quality" (mean)                                      | 3.75                             | 3.75                                       | 3.27                          | 3.35                            | 3.76            | 3.65                     | 3.46                     | 3.03                                                             | 2.31                               | 3.65                              | 3.92                      | 4.11                                                                 | 3.93                                                             | 2.21                     | 3.44                             |
| Engagement (mean)                                                  | 3                                | 3                                          | 3                             | 3.4                             | 4.2             | 2.8                      | 2.6                      | 2.4                                                              | 2                                  | 3.6                               | 4.6                       | 4                                                                    | 4.2                                                              | 1.6                      | 3                                |
| Functionality (mean)                                               | 3.25                             | 3.25                                       | 4                             | 3.25                            | 3.75            | 4                        | 4                        | 3.25                                                             | 3                                  | 3                                 | 2.75                      | 4.25                                                                 | 3.25                                                             | 4                        | 3.75                             |
| Aesthetics (mean)                                                  | 4.33                             | 4.33                                       | 3.33                          | 3                               | 4.33            | 4                        | 3.5                      | 3.67                                                             | 2.5                                | 4.33                              | 4                         | 5                                                                    | 3.67                                                             | 2                        | 3.67                             |
| Information (mean)                                                 | 4.4                              | 4.4                                        | 2.75                          | 3.75                            | 2.75            | 3.8                      | 3.75                     | 2.8                                                              | 1.75                               | 3.67                              | 4.33                      | 3.2                                                                  | 4.6                                                              | 1.25                     | 3.33                             |
| MARS "Subjective Quality" (mean)                                   | 3.25                             | 3.25                                       | 2.5                           | 1.75                            | 3.25            | 2                        | 2                        | 3                                                                | 1.25                               | 4.5                               | 4                         | 2.75                                                                 | 3.5                                                              | 1                        | 2.5                              |
| Recommend app                                                      | 4                                | 4                                          | 3                             | 2                               | 3               | 2                        | 2                        | 3                                                                | 1                                  | 4                                 | 3                         | 4                                                                    | 4                                                                | 1                        | 2                                |
| Potential app use                                                  | 2                                | 2                                          | 3                             | 2                               | 3               | 2                        | 2                        | 3                                                                | 2                                  | 4                                 | 4                         | 2                                                                    | 4                                                                | 1                        | 2                                |
| Pay for app                                                        | 3                                | 3                                          | 1                             | 1                               | 3               | 1                        | 1                        | 3                                                                | 1                                  | 5                                 | 5                         | 1                                                                    | 3                                                                | 1                        | 3                                |
| Overall star rating (out of 5)                                     | 4                                | 4                                          | 3                             | 2                               | 4               | 3                        | 3                        | 3                                                                | 1                                  | 5                                 | 4                         | 4                                                                    | 3                                                                | 1                        | 3                                |

Supplementary Appendix 2: Table 1 Characteristics, availability and MARS scores of dementia apps (N=75)  
Data correct as at 30 July 2020

|                                                                    | 61                                                             | 62                                                 | 63                                                | 64                             | 65                                | 66                         | 67                                          | 68                                               | 69                               | 70                    | 71                                     | 72                               | 73                                        | 74                                   | 75                                                          |
|--------------------------------------------------------------------|----------------------------------------------------------------|----------------------------------------------------|---------------------------------------------------|--------------------------------|-----------------------------------|----------------------------|---------------------------------------------|--------------------------------------------------|----------------------------------|-----------------------|----------------------------------------|----------------------------------|-------------------------------------------|--------------------------------------|-------------------------------------------------------------|
| APP DETAILS                                                        |                                                                |                                                    |                                                   |                                |                                   |                            |                                             |                                                  |                                  |                       |                                        |                                  |                                           |                                      |                                                             |
| App Name                                                           | Living and Dying Well With Dementia                            | MemorC                                             | MIND App for Alzheimer's, Parkinson's & essential | MindMate - For a healthy brain | Much Too Young Virtual Reality    | My House of Memories       | Natural Ways to Prevent Alzheimer's Disease | Promenade - Revisit a Life of Memories, Together | Support for Care by Active Minds | Symptomguide Dementia | The Dementia-Friendly Home             | Understanding Dementia [v.2]     | Verily Connect                            | Young Onset Dementia (YOD)           | Yugro Assist App                                            |
| Platform available on                                              | iPhone                                                         | •                                                  | •                                                 | •                              | •                                 | •                          | •                                           | •                                                | •                                | •                     | •                                      | •                                | •                                         | •                                    | •                                                           |
|                                                                    | iPad                                                           | •                                                  | •                                                 | •                              | •                                 | •                          | •                                           | •                                                | •                                | •                     | •                                      | •                                | •                                         | •                                    | •                                                           |
|                                                                    | Android                                                        |                                                    |                                                   |                                | •                                 | •                          | •                                           |                                                  | •                                |                       |                                        | •                                | •                                         | •                                    | •                                                           |
| Platform tested on                                                 | iPhone                                                         | iPad                                               | iPad                                              | iPhone                         | iPhone                            | iPhone                     | Android                                     | iPad                                             | iPad                             | iPhone                | iPhone                                 | iPad                             | iPhone                                    | iPhone                               | iPhone                                                      |
| Developer                                                          | Developer: Footsqueek, Creator: Alzheimer's Society and others | Developer: Topos Productions, Creator: Warren Wong | General Electric Company                          | MindMate Ltd.                  | The Digital Generals Media Inc.   | National Museums Liverpool | RK Unit                                     | Chris Benoit                                     | Active Minds                     | DGI Clinical          | Dementia Australia & Deakin University | Scottish Social Services Council | La Trobe University, John Richards Centre | Leicestershire Partnership NHS Trust | Developer (Apple): John Salt, Developer (Android): Soulttoy |
| Rating (out of 5)                                                  | NER                                                            | NER                                                | NER                                               | 4.7                            | NER                               | NER                        | NER                                         | NER                                              | NER                              | NER                   | 1.0                                    | NER                              | 5                                         | NER                                  | NER                                                         |
| Number of ratings                                                  | 0                                                              | 0                                                  | 0                                                 | 299                            | 0                                 | 0                          | 0                                           | 0                                                | 0                                | 0                     | 1                                      | 0                                | 3                                         | 0                                    | 0                                                           |
| Version                                                            | 1.0.2                                                          | 3.2                                                | 2.2                                               | 7.0.0                          | 2.1                               | 6.8.0                      | 1.0                                         | 1.82                                             | 1.2.5                            | 0.9.9.7               | 2.0                                    | 2.0                              | 1.2.8                                     | Unknown                              | Unknown                                                     |
| Last update                                                        | 18-Dec-2015                                                    | 21-July-2019                                       | 13-Jan-2017                                       | 10-May-2020                    | 21-Oct-2017                       | 31-May-20                  | 21-Nov-2019                                 | 22-Mar-2017                                      | 24-Feb-2020                      | 01-Aug-19             | 26-Sept-2016                           | 10-Mar-2016                      | 12-Mar-20                                 | Unknown                              | Unknown                                                     |
| Cost (\$AU)                                                        | 0                                                              | 0                                                  | 0                                                 | 0                              | 0                                 | 0                          | 0                                           | 7.99                                             | 0                                | 0                     | 0                                      | 0                                | 0                                         | 0                                    | 0                                                           |
| Upgrade (\$AU)                                                     | N/A                                                            | 1.49/month                                         | N/A                                               | N/A                            | N/A                               | N/A                        | N/A                                         | N/A                                              | GBP 1.99/month                   | N/A                   | N/A                                    | N/A                              | N/A                                       | N/A                                  | N/A                                                         |
| Content of apps - focus areas                                      |                                                                |                                                    |                                                   |                                |                                   |                            |                                             |                                                  |                                  |                       |                                        |                                  |                                           |                                      |                                                             |
| (i) Information & Resources                                        | •                                                              |                                                    |                                                   |                                | •                                 | •                          | •                                           |                                                  |                                  | •                     | •                                      | •                                | •                                         | •                                    |                                                             |
| (ii) Practical Caregiving & Communication                          | •                                                              | •                                                  | •                                                 |                                |                                   | •                          | •                                           | •                                                | •                                | •                     | •                                      | •                                | •                                         | •                                    |                                                             |
| (iii) Caregiver Support & Resources                                |                                                                |                                                    |                                                   |                                |                                   |                            |                                             |                                                  |                                  |                       |                                        |                                  | •                                         |                                      | •                                                           |
| (iv) Prevention (Multidimensional)                                 |                                                                |                                                    |                                                   | •                              |                                   |                            | •                                           |                                                  |                                  |                       |                                        |                                  | •                                         |                                      |                                                             |
| Age group/s                                                        | Adults                                                         | Adults                                             | Adults                                            | Young Adults, Adults           | Adolescents, Young Adults, Adults | Adults                     | Young Adults, Adults                        | Young Adults, Adults                             | Adults                           | Young Adults, Adults  | Adults                                 | Adults                           | Adults                                    | Young Adults, Adults                 | Adults                                                      |
| Target user group/s                                                |                                                                |                                                    |                                                   |                                |                                   |                            |                                             |                                                  |                                  |                       |                                        |                                  |                                           |                                      |                                                             |
| (i) Person living with dementia                                    | •                                                              | •                                                  | •                                                 |                                |                                   | •                          | •                                           | •                                                |                                  |                       |                                        |                                  |                                           | •                                    |                                                             |
| (ii) Primary caregiver (informal) or partner/spouse                | •                                                              | •                                                  | •                                                 |                                | •                                 | •                          | •                                           | •                                                | •                                | •                     | •                                      | •                                | •                                         | •                                    | •                                                           |
| (iii) Family or close friends                                      | •                                                              |                                                    | •                                                 |                                | •                                 | •                          | •                                           | •                                                | •                                |                       | •                                      |                                  |                                           | •                                    |                                                             |
| (iv) Health and medical professionals, students, formal caregivers |                                                                |                                                    |                                                   |                                | •                                 | •                          |                                             |                                                  | •                                | •                     | •                                      | •                                |                                           | •                                    |                                                             |
| (v) General public                                                 |                                                                |                                                    |                                                   | •                              | •                                 |                            |                                             |                                                  |                                  |                       |                                        |                                  |                                           |                                      |                                                             |
| Affiliation                                                        | NGO                                                            | Commercial                                         | Commercial                                        | Unknown                        | Commercial                        | Government, NGO            | Commercial                                  | Unknown                                          | Commercial                       | Unknown               | NGO, University                        | Government                       | University                                | Government                           | Unknown                                                     |
| Language/s                                                         | English                                                        | English                                            | English                                           | English                        | English                           | English                    | English                                     | English                                          | English                          | English               | English                                | English                          | English                                   | English                              | English                                                     |
| MARS "Overall Quality" (mean)                                      | 3.24                                                           | 2.83                                               | 3.56                                              | 4.1                            | 4.18                              | 3.41                       | 2.27                                        | 3.67                                             | 3.12                             | 3.73                  | 3.41                                   | 3.75                             | 4.24                                      | 3.4                                  | 3.38                                                        |
| Engagement (mean)                                                  | 3.2                                                            | 3                                                  | 3.4                                               | 4.4                            | 3.8                               | 4.2                        | 2                                           | 4                                                | 3.4                              | 4                     | 3.2                                    | 3                                | 4.2                                       | 2.6                                  | 3.75                                                        |
| Functionality (mean)                                               | 2.75                                                           | 3                                                  | 4                                                 | 4                              | 4.25                              | 3.25                       | 3                                           | 3.5                                              | 3.5                              | 3.5                   | 3                                      | 3.25                             | 4                                         | 4                                    | 3                                                           |
| Aesthetics (mean)                                                  | 3                                                              | 3.33                                               | 4.33                                              | 4                              | 4.67                              | 2.67                       | 2.33                                        | 4.67                                             | 3                                | 4                     | 3.67                                   | 4.33                             | 4                                         | 3                                    | 4                                                           |
| Information (mean)                                                 | 4                                                              | 2                                                  | 2.5                                               | 4                              | 4                                 | 3.5                        | 1.75                                        | 2.5                                              | 2.6                              | 3.4                   | 3.75                                   | 4.4                              | 4.75                                      | 4                                    | 2.75                                                        |
| MARS "Subjective Quality" (mean)                                   | 3                                                              | 2                                                  | 3.25                                              | 4                              | 2.25                              | 3                          | 1.25                                        | 3.75                                             | 2                                | 3                     | 3                                      | 3.25                             | 4.25                                      | 2.5                                  | 2.5                                                         |
| Recommend app                                                      | 3                                                              | 2                                                  | 3                                                 | 3                              | 3                                 | 3                          | 1                                           | 3                                                | 2                                | 3                     | 3                                      | 4                                | 4                                         | 3                                    | 3                                                           |
| Potential app use                                                  | 3                                                              | 2                                                  | 3                                                 | 4                              | 2                                 | 3                          | 1                                           | 3                                                | 2                                | 3                     | 3                                      | 2                                | 4                                         | 3                                    | 3                                                           |
| Pay for app                                                        | 3                                                              | 1                                                  | 3                                                 | 5                              | 1                                 | 3                          | 1                                           | 5                                                | 1                                | 3                     | 3                                      | 3                                | 5                                         | 1                                    | 1                                                           |
| Overall star rating (out of 5)                                     | 3                                                              | 3                                                  | 4                                                 | 4                              | 3                                 | 3                          | 2                                           | 4                                                | 3                                | 3                     | 3                                      | 4                                | 4                                         | 3                                    | 3                                                           |
